# Supplementary material for: Berberine-loaded polylactic acid nanofiber scaffold as a drug delivery system: The relationship between chemical characteristics, drug-release behavior, and antibacterial efficiency
Source: publisher site journal article supplement (doi:10.3762/bjnano.15.7), 2024-01-12

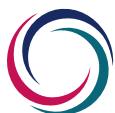

## Supporting Information

for

### **Berberine-loaded polylactic acid nanofiber scaffold as a drug delivery system: The relationship between chemical characteristics, drug-release behavior, and antibacterial efficiency**

Le Thi Le, Hue Thi Nguyen, Liem Thanh Nguyen, Huy Quang Tran  
and Thuy Thi Thu Nguyen

*Beilstein J. Nanotechnol.* **2024**, *15*, 71–82. [doi:10.3762/bjnano.15.7](https://doi.org/10.3762/bjnano.15.7)

### **Photographs of agar plates inoculated with MRSA treated with BBR/PLA and BBR NPs/PLA nanofiber scaffolds and negative control**

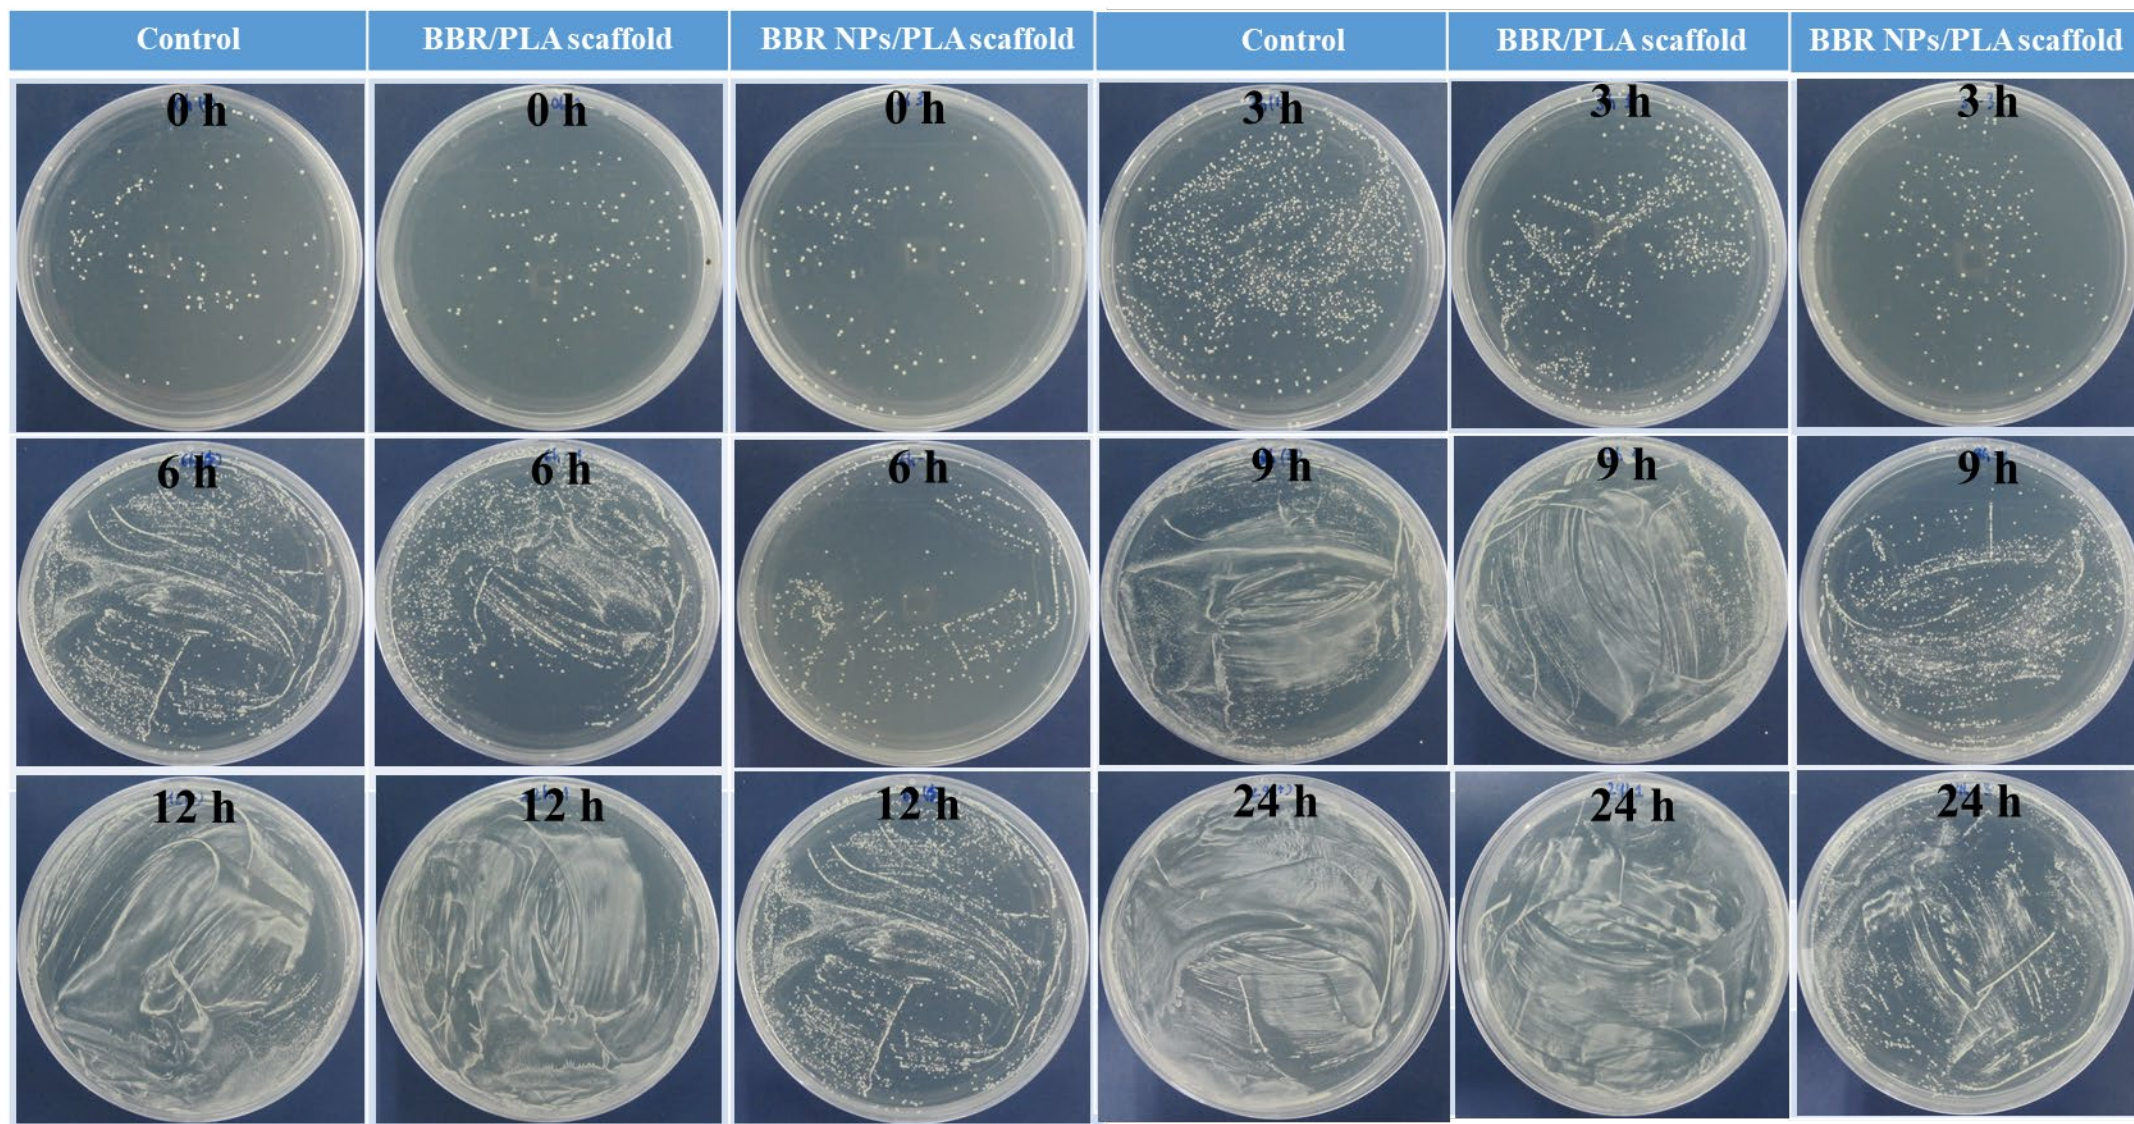

Supplement: Additional file 2 [file 2190-4286-15-7-S2.pdf]
